# Supplementary figures and images for: Cost-effectiveness of full endoscopic versus open discectomy for sciatica
Source: PubMed Central journal article supplement — Br J Sports Med. 2022 Feb 20;56(18):1018–25. doi: 10.1136/bjsports-2021-104808 (PMC9484367; doi:10.1136/bjsports-2021-104808), 2022-02-20

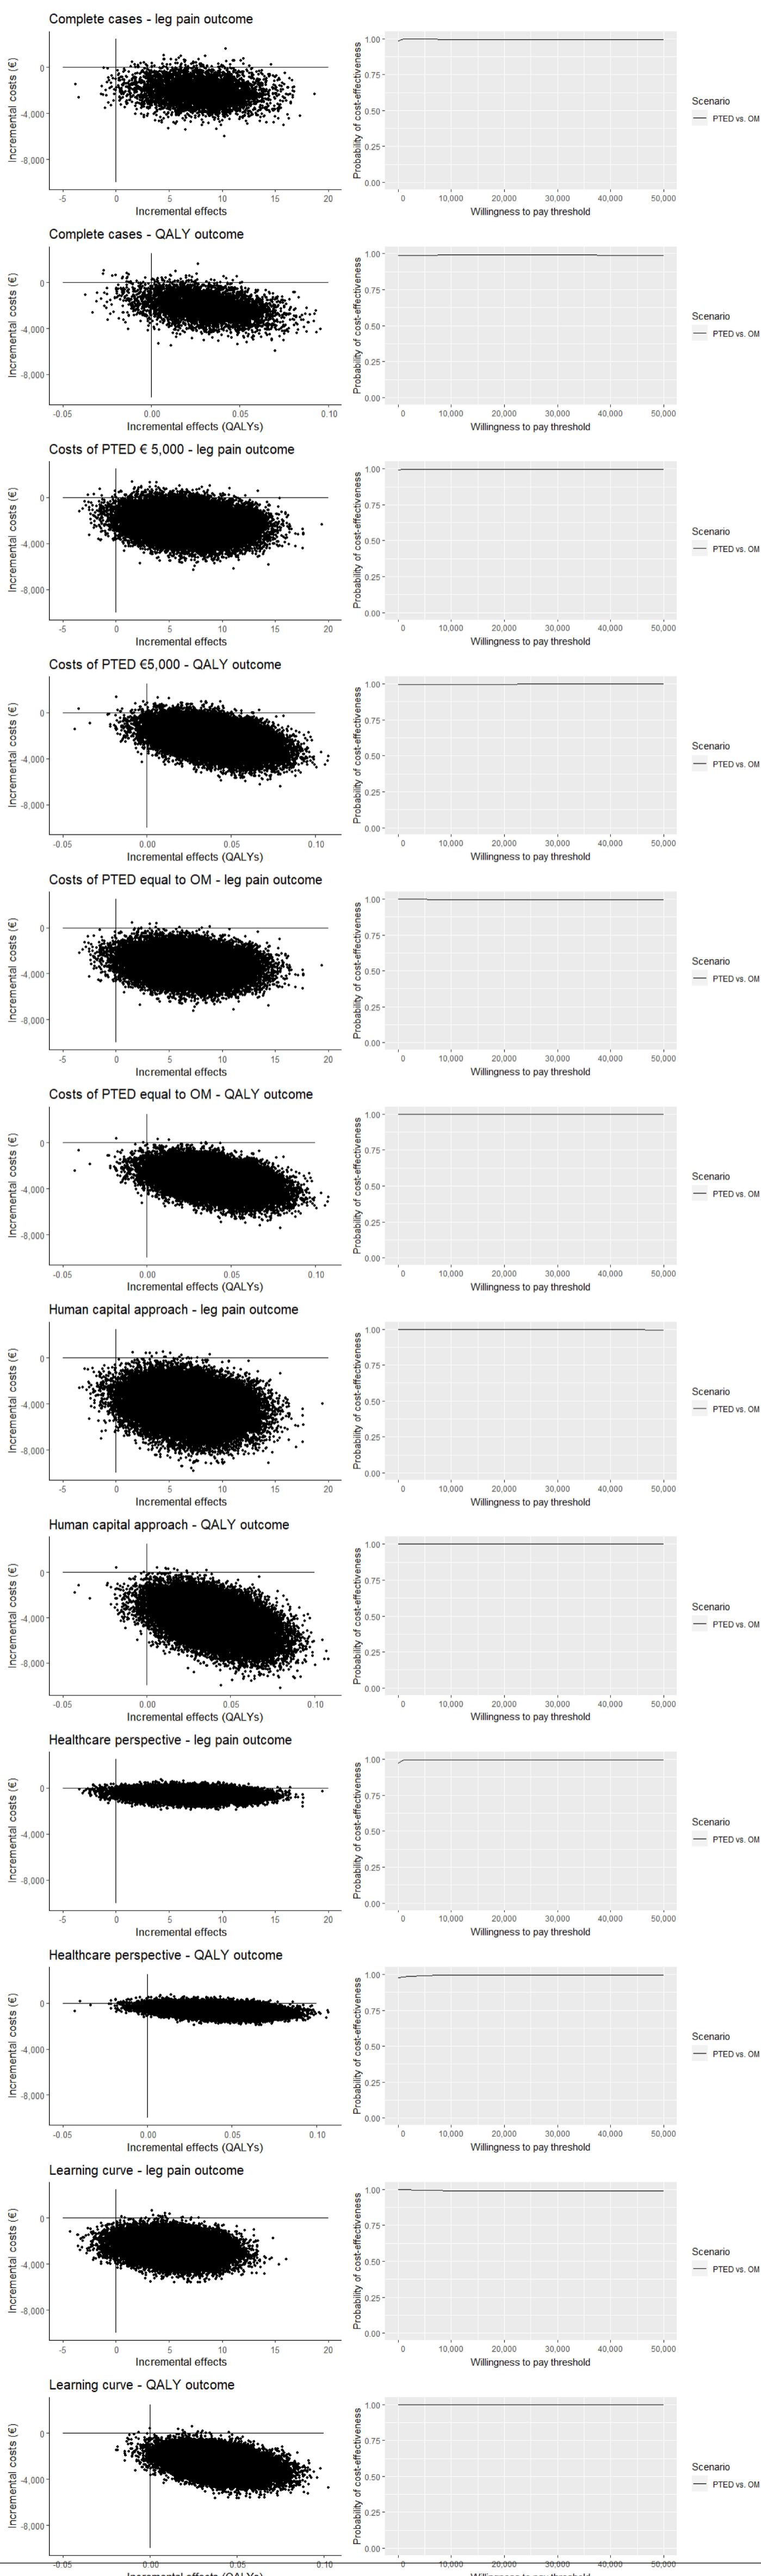

Supplement: bjsports-2021-104808supp001.pdf [file bjsports-2021-104808supp001.pdf]
