# Supplementary figures and images for: Cost-effectiveness of full endoscopic versus open discectomy for sciatica
Source: HighWire-hosted journal article supplement (doi:10.1136/bjsports-2021-104808), 2022-02-20

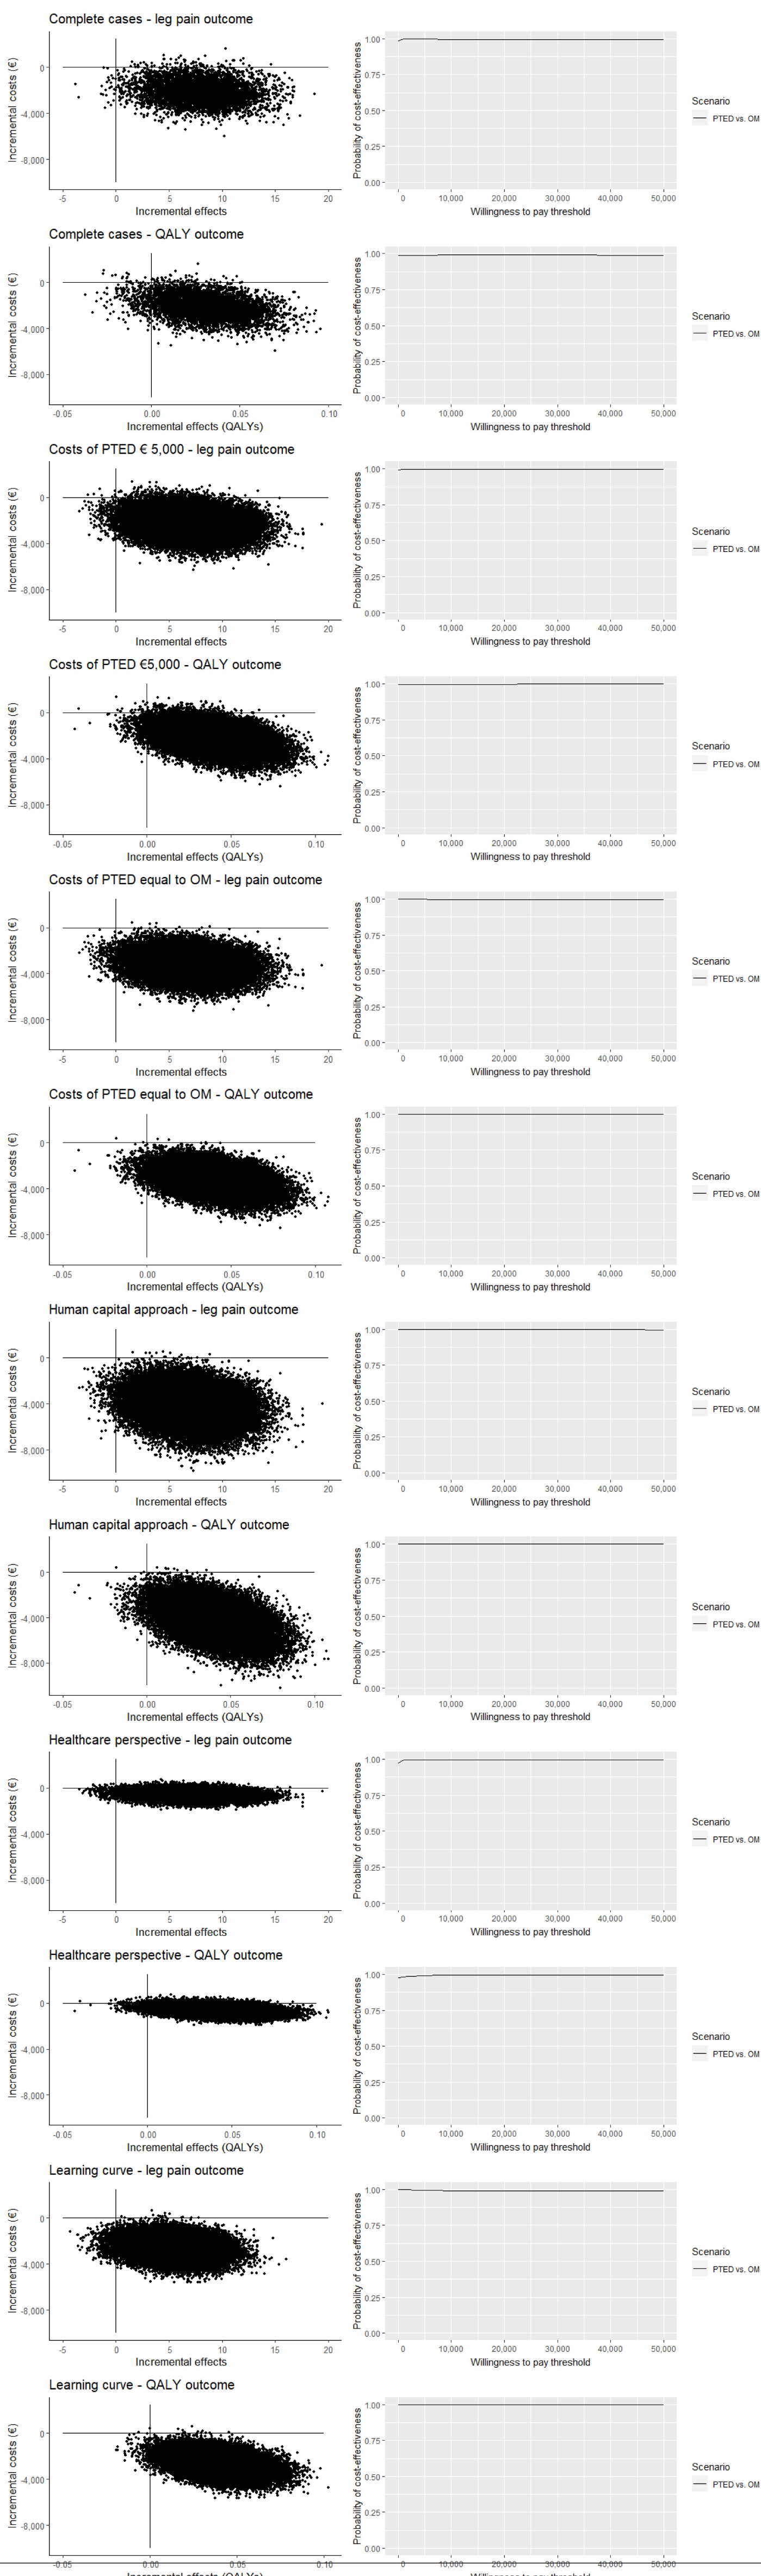

Supplement: bjsports-2021-104808supp001_data_supplement.pdf [file bjsports-2021-104808supp001_data_supplement.pdf]

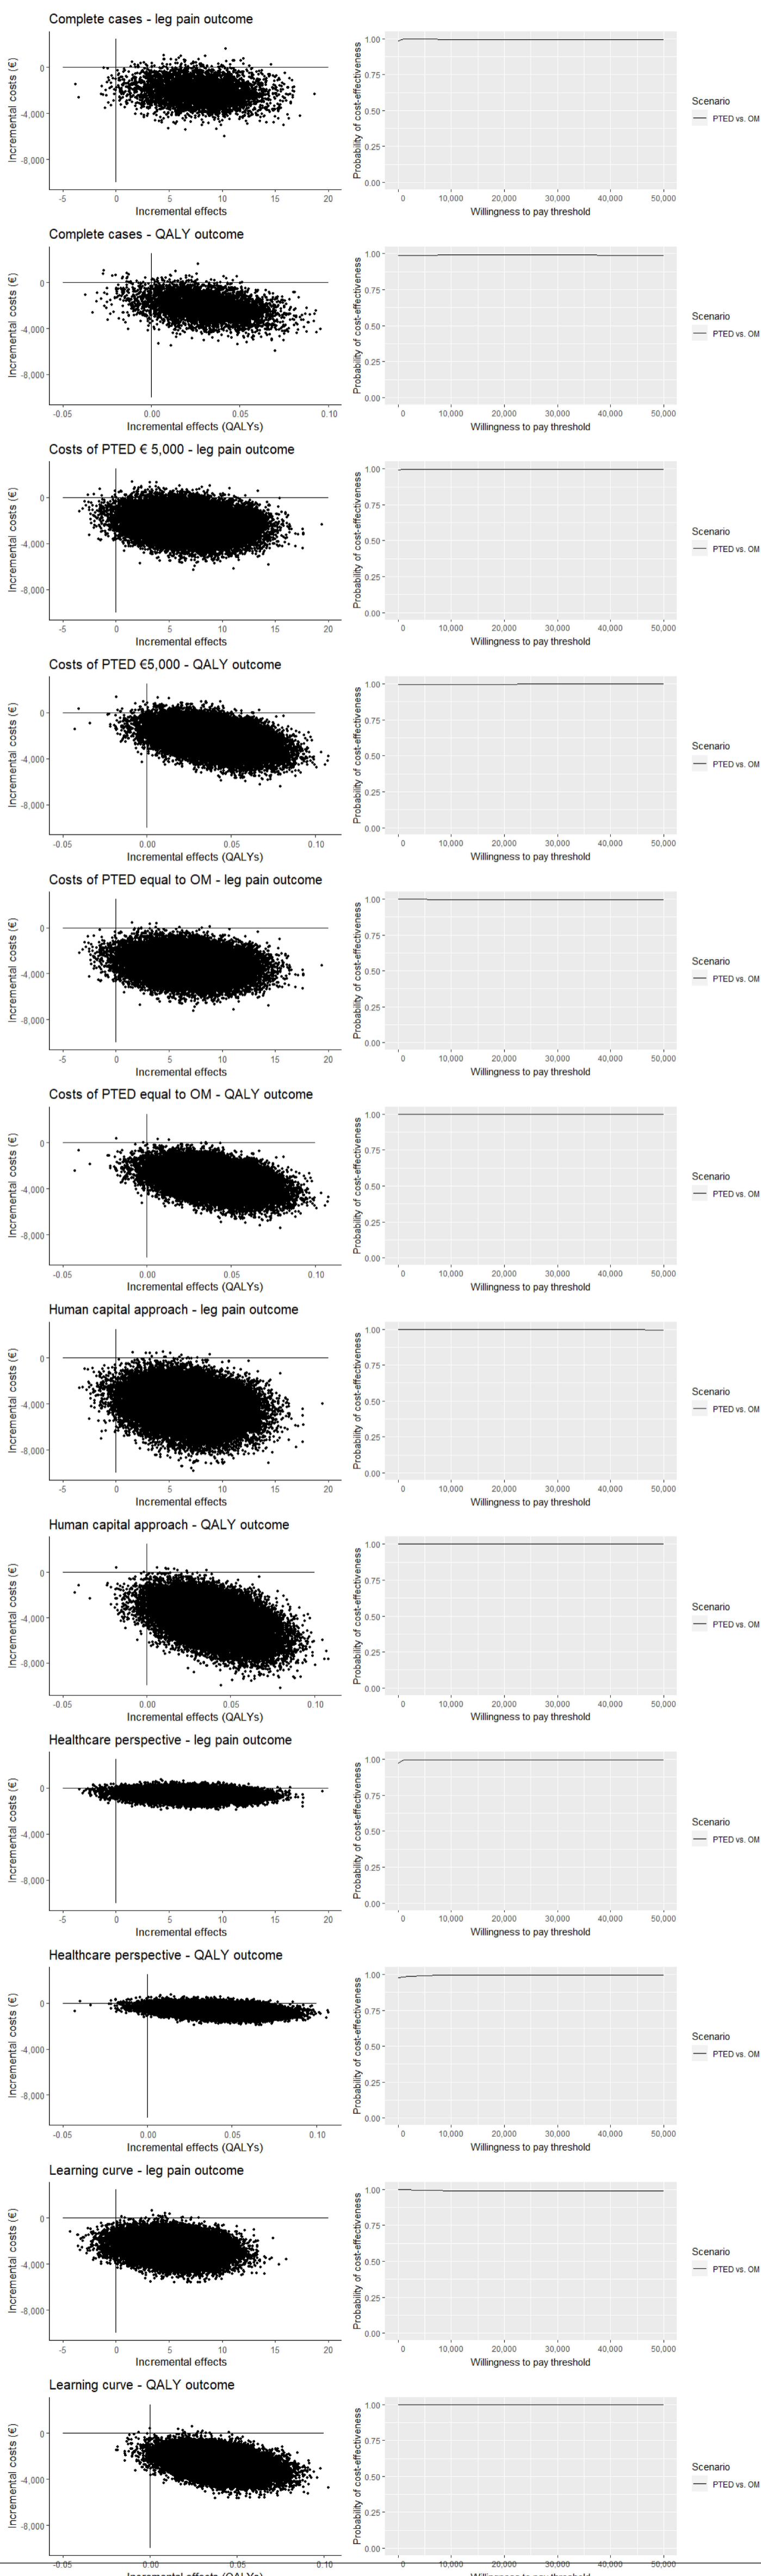

Supplement: bjsports-2021-104808supp001_data_supplement.pdf [file bjsports-2021-104808supp001_data_supplement.pdf]
